# Supplementary material for: Field Cage Studies and Progressive Evaluation of Genetically-Engineered Mosquitoes
Source: PLOS journal article supplement (doi:10.1371/journal.pntd.0002001), 2013-01-17

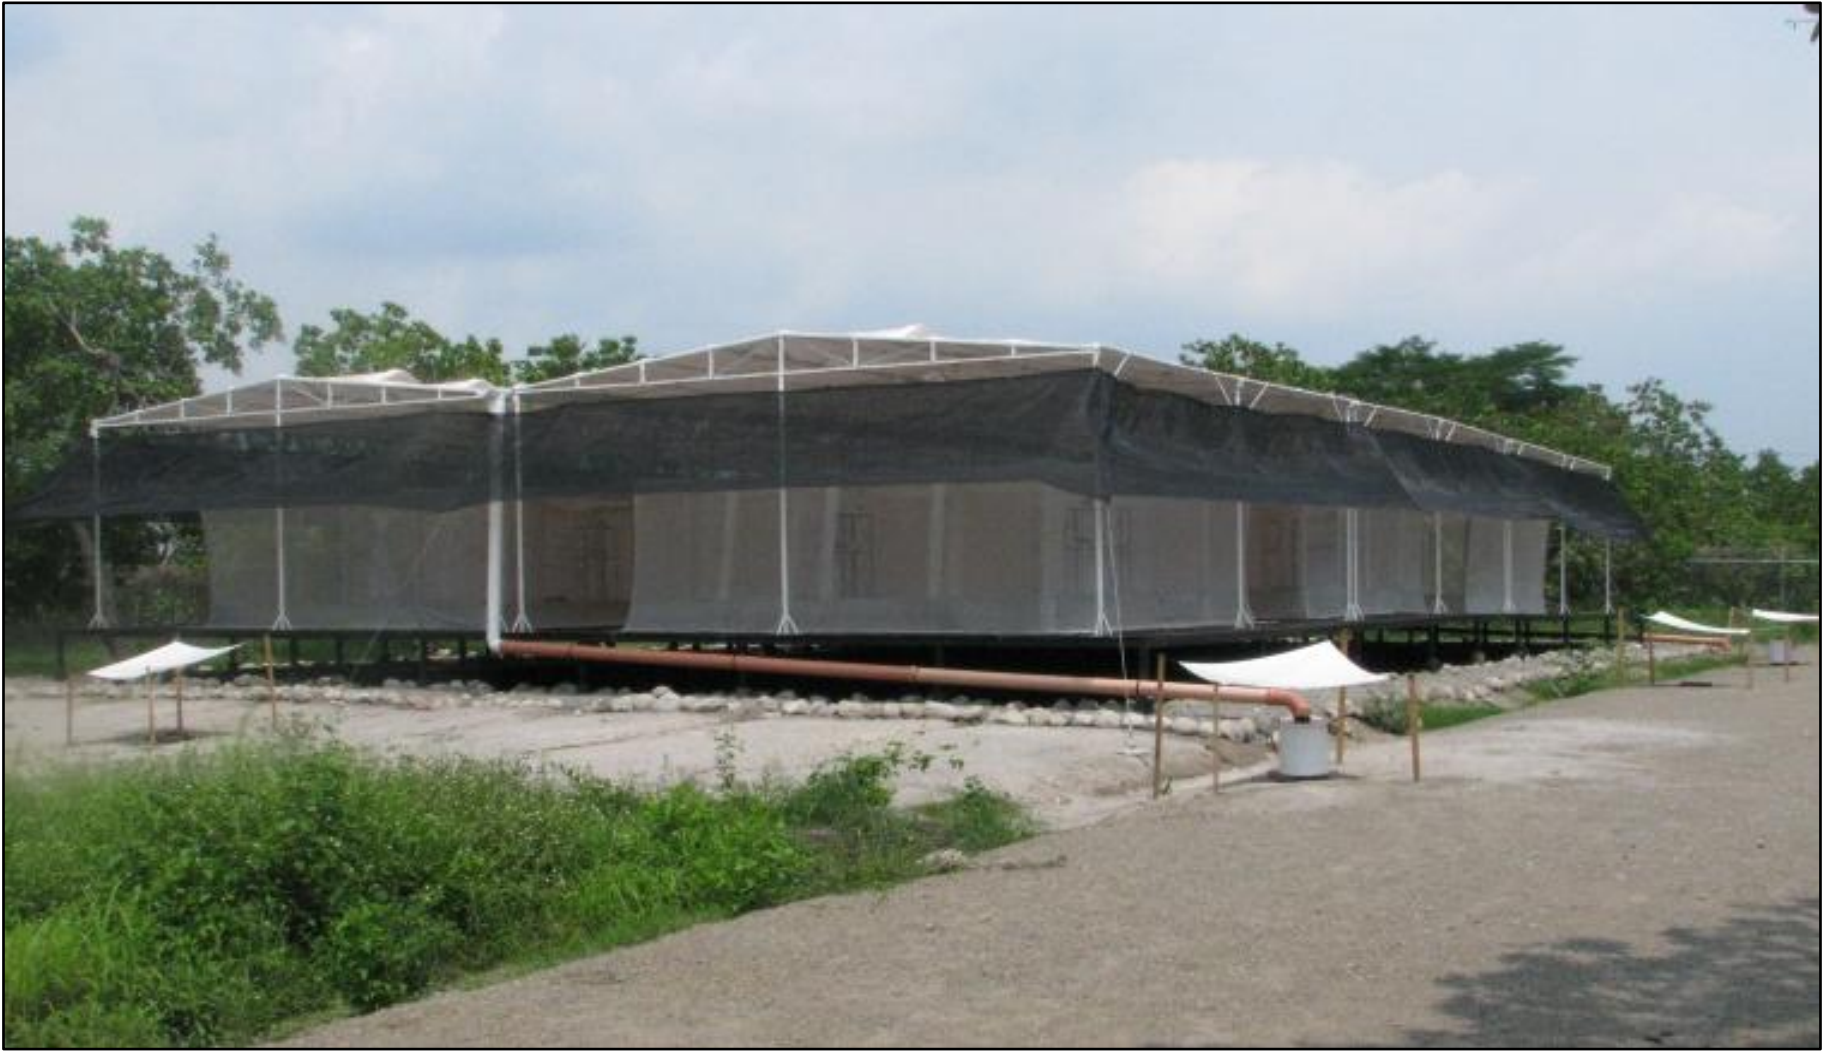

Supplement: S1 (10.1371/journal.pntd.0002001.s001) [file journal.pntd.0002001.s001]
